# Supplementary material for: Children’s sugar-sweetened beverages consumption: associations with family and home-related factors, differences within ethnic groups explored
Source: PubMed Central journal article supplement (PMC5310003; doi:10.1186/s12889-017-4095-0), 2017-02-14
Supplement: 12889_2017_4095_MOESM3_ESM.pdf [file 12889_2017_4095_MOESM3_ESM.pdf]

**Table S3. SSB intake in servings per day for the overall sample and according to ethnic background of the child (n=644)**

|                                | <i>Overall sample</i><br>(n=644)<br>% or mean (SD) | <b>Dutch</b><br>(n=195)<br>% or mean (SD) | <b>Surinamese/Antillean</b><br>(n=142)<br>% or mean (SD) | <b>Moroccan/Turkish</b><br>(n=185)<br>% or mean (SD) | <b>Other/unknown</b><br>(n=119)<br>% or mean (SD) | <i>p</i> -value <sup>a</sup> |
|--------------------------------|----------------------------------------------------|-------------------------------------------|----------------------------------------------------------|------------------------------------------------------|---------------------------------------------------|------------------------------|
| <b><i>SSB intake child</i></b> |                                                    |                                           |                                                          |                                                      |                                                   |                              |
| >2 SSB servings per day, % yes | 59.3%                                              | 54.9%                                     | 71.8%                                                    | 55.7%                                                | 57.1%                                             | <b>0.007</b>                 |

a = differences between groups stratified for outcome measures, tested with one-way Anova (continuous variables) and Chi-square test (categorical variables).

Note: numbers printed in **bold** represent significant differences between the ethnic backgrounds groups.

**Table S4. P-values for interaction between ethnic background and the determinants on child's SSB intake in servings per day\* (n=644)**

|                                                                                                         | SSB servings                                     |                                              |                                           |
|---------------------------------------------------------------------------------------------------------|--------------------------------------------------|----------------------------------------------|-------------------------------------------|
|                                                                                                         | <i>p</i> -value<br>Dutch vs Surinamese/Antillean | <i>p</i> -value<br>Dutch vs Moroccan/Turkish | <i>p</i> -value<br>Dutch vs Other/unknown |
| <b><i>Cognitive variables<sup>1</sup></i></b>                                                           |                                                  |                                              |                                           |
| Parental attitude towards child's SSB intake ( <i>range 1-5</i> )                                       | 0.002                                            | 0.003                                        | 0.011                                     |
| Parental attitude towards decreasing child's SSB intake ( <i>range 1-5</i> )                            | NS                                               | NS                                           | NS                                        |
| Parents subjective norm towards the child's SSB intake ( <i>range 1-5</i> )                             | NS                                               | NS                                           | NS                                        |
| Perceived behavioural control of parents towards having their child drink less SSB ( <i>range 1-5</i> ) | NS                                               | NS                                           | NS                                        |
| <b><i>Environmental variables<sup>1</sup></i></b>                                                       |                                                  |                                              |                                           |
| Availability of SSB at home/school ( <i>range 1-5</i> )                                                 | NS                                               | 0.022                                        | 0.080                                     |
| Parenting practices towards child's SSB intake ( <i>range 1-5</i> )                                     | NS                                               | NS                                           | NS                                        |
| Rules at home with regard to child's SSB intake ( <i>range 1-2</i> )                                    | NS                                               | NS                                           | 0.032                                     |
| Modelling of SSB intake by the parents ( <i>range 1-5</i> )                                             | NS                                               | 0.066                                        | 0.065                                     |
| – Separate item 'Parental Modelling' ( <i>range 1-5</i> )                                               | 0.088                                            | NS                                           | NS                                        |
| <b><i>Habitual variables<sup>1</sup></i></b>                                                            |                                                  |                                              |                                           |
| Habit strength of the child's SSB intake ( <i>range 1-5</i> )                                           | NS                                               | <0.001                                       | NS                                        |
| Taste preference of child towards SSB ( <i>range 1-5</i> )                                              | NS                                               | NS                                           | NS                                        |

\*Separately per block of variables (cognitive, environmental, and habitual) the interaction was analysed, being only corrected for the variables in that block and not for any other variables or socio-demographic variables. As seen in this supplement table 4, several interactions differed statistically ( $p < 0.10$ ) [60].

NS = not significant ( $p > 0.10$ ).

<sup>1</sup>Higher scores indicate the expectation of more SSB consumption/a higher score on unfavourable behaviour.

**Table S5. Results from the logistic regression models evaluating the associations between family and home-related factors and child's SSB intake in servings per day ( $\leq 2$  vs  $> 2$ )**

|                                                        | Model 1 (n=604)            | Model 2 (n=570)            | Model 3 (n=565)            | Model 4 (n=611)            | Model 5 (n=516)            |
|--------------------------------------------------------|----------------------------|----------------------------|----------------------------|----------------------------|----------------------------|
|                                                        | OR (95% CI)                | OR (95% CI)                | OR (95% CI)                | OR (95% CI)                | OR (95% CI)                |
| <b><i>Socio-demographic characteristics</i></b>        |                            |                            |                            |                            |                            |
| Gender child, boy=ref                                  | <b>0.65 (0.46;0.92)*</b>   |                            |                            |                            | 0.75 (0.49;1.14)           |
| Age child (in years)                                   | <b>1.21 (1.09;1.34)***</b> |                            |                            |                            | <b>1.27 (1.11;1.44)***</b> |
| Ethnic background child                                |                            |                            |                            |                            |                            |
| Dutch                                                  | - REF -                    |                            |                            |                            | - REF -                    |
| Surinamese/Antillean                                   | 1.52 (0.93;2.50)           |                            |                            |                            | 1.11 (0.60;2.05)           |
| Moroccan/Turkish                                       | <b>0.61 (0.38;0.98)*</b>   |                            |                            |                            | 0.61 (0.34;1.10)           |
| Other/unknown                                          | 0.64 (0.37;1.09)           |                            |                            |                            | 0.55 (0.28;1.07)           |
| Educational level of parent                            |                            |                            |                            |                            |                            |
| Low                                                    | <b>3.30 (1.87;5.83)***</b> |                            |                            |                            | <b>2.20 (1.10;4.42)*</b>   |
| Mid-low                                                | 1.30 (0.78;2.15)           |                            |                            |                            | 1.23 (0.66;2.30)           |
| Mid-high                                               | <b>3.10 (1.89;5.08)***</b> |                            |                            |                            | <b>2.31 (1.26;4.22)**</b>  |
| High                                                   | - REF -                    |                            |                            |                            | - REF -                    |
| <b><i>Cognitive variables<sup>1</sup></i></b>          |                            |                            |                            |                            |                            |
| Attitude                                               |                            | <b>1.48 (1.08;2.04)*</b>   |                            |                            | 0.74 (0.48;1.14)           |
| Attitude towards decreasing SSB                        |                            | 0.84 (0.66;1.06)           |                            |                            | 0.93 (0.69;1.26)           |
| Subjective norm                                        |                            | <b>1.96 (1.55;2.48)***</b> |                            |                            | <b>1.62 (1.22;2.14)**</b>  |
| Perceived behavioural control                          |                            | 1.04 (0.84;1.27)           |                            |                            | 0.80 (0.60;1.05)           |
| <b><i>Environmental variables<sup>1</sup></i></b>      |                            |                            |                            |                            |                            |
| Availability                                           |                            |                            | 1.04 (0.90;1.21)           |                            | 0.98 (0.81;1.19)           |
| Parenting practices                                    |                            |                            | <b>1.84 (1.32;2.56)***</b> |                            | <b>1.54 (1.04;2.28)*</b>   |
| Rules                                                  |                            |                            | 1.60 (0.98;2.60)           |                            | 1.31 (0.75;2.29)           |
| Modelling                                              |                            |                            | <b>1.78 (1.47;2.14)***</b> |                            | <b>1.60 (1.29;1.98)***</b> |
| – Modelling <i>separate item</i>                       |                            |                            | 0.90 (0.79;1.03)           |                            | 0.94 (0.81;1.09)           |
| <b><i>Habitual variables<sup>1</sup></i></b>           |                            |                            |                            |                            |                            |
| Habit strength                                         |                            |                            |                            | <b>2.08 (1.68;2.56)***</b> | <b>1.49 (1.08;2.06)*</b>   |
| Taste preference                                       |                            |                            |                            | 0.92 (0.76;1.13)           | 1.01 (0.79;1.30)           |
| <b>Nagelkerke R<sup>2</sup> (adjusted)<sup>2</sup></b> | <b>.133</b>                | <b>.126</b>                | <b>.222</b>                | <b>.121</b>                | <b>.330</b>                |

REF = reference category.

<sup>1</sup> Higher scores indicate expectation of more SSB consumption/higher score on unfavourable behaviour.

<sup>2</sup> Nagelkerke R square statistic represents the estimated level of variance explained by the regression model.

Note: numbers printed in **bold** represent significant association between independent variable and  $\leq 2$  vs  $> 2$  SSB intake in servings per day of child in that model. Asterisks' represent the level of significance of the association between independent variable and outcome, corrected for all other variables: \* p<0.05, \*\* p<0.01, \*\*\* p<0.001.

**Table S6: Results from the full logistic regression model evaluating the associations between family and home-related factors and child's SSB intake in servings per day ( $\leq 2$  vs  $> 2$ ) according to ethnic background child**

|                                                        | Dutch<br>(n=167)          | Surinamese/Antillean<br>(n=111) | Moroccan/Turkish<br>(n=147) | Other/unknown<br>(n=91)   |
|--------------------------------------------------------|---------------------------|---------------------------------|-----------------------------|---------------------------|
|                                                        | OR (95%CI)                | OR (95%CI)                      | OR (95%CI)                  | OR (95%CI)                |
| <b><i>Socio-demographic characteristics</i></b>        |                           |                                 |                             |                           |
| Gender child, boy=ref                                  | <b>0.37 (0.14;0.97)*</b>  | 1.20 (0.35;4.09)                | <b>0.41 (0.18;0.94)*</b>    | 1.17 (0.40;3.39)          |
| Age child (in years)                                   | 1.20 (0.92;1.56)          | 1.34 (0.94;1.91)                | <b>1.35 (1.06;1.73)*</b>    | 1.37 (0.96;1.96)          |
| Educational level of parent                            |                           |                                 |                             |                           |
| Low                                                    | <b>8.67 (1.37;54.79)*</b> | 5.83 (0.47;71.84)               | 0.98 (0.21;4.50)            | 0.99 (0.19;5.25)          |
| Mid-low                                                | 0.46 (0.13;1.63)          | 5.36 (0.90;31.96)               | 0.63 (0.14;2.94)            | 1.43 (0.26;7.68)          |
| Mid-high                                               | 3.09 (0.93;10.28)         | <b>5.35 (1.22;23.42)*</b>       | 0.80 (0.16;3.97)            | 1.76 (0.39;7.99)          |
| High                                                   | - REF -                   | - REF -                         | - REF -                     | - REF -                   |
| <b><i>Cognitive variables<sup>1</sup></i></b>          |                           |                                 |                             |                           |
| Attitude                                               | 2.41 (0.78;7.51)          | <b>0.13 (0.03;0.56)**</b>       | 1.05 (0.50;2.23)            | 0.99 (0.34;2.90)          |
| Attitude towards decreasing SSB                        | 1.11 (0.55;2.26)          | 0.55 (0.23;1.29)                | 1.07 (0.56;2.05)            | 1.03 (0.49;2.16)          |
| Subjective norm                                        | 1.85 (0.91;3.77)          | 1.26 (0.53;3.02)                | <b>1.95 (1.20;3.16)**</b>   | 1.25 (0.59;2.66)          |
| Perceived behavioural control                          | 0.82 (0.45;1.48)          | 1.24 (0.55;2.80)                | 0.79 (0.45;1.41)            | 0.80 (0.42;1.54)          |
| <b><i>Environmental variables<sup>1</sup></i></b>      |                           |                                 |                             |                           |
| Availability                                           | 1.15 (0.74;1.79)          | 1.60 (0.84;3.03)                | 0.87 (0.62;1.22)            | 0.76 (0.43;1.34)          |
| Parenting practices                                    | 1.72 (0.74;4.02)          | 2.78 (0.92;8.44)                | <b>2.18 (1.00;4.75)*</b>    | 0.90 (0.32;2.54)          |
| Rules                                                  | 0.76 (0.20;2.83)          | 0.97 (0.23;4.15)                | 1.12 (0.37;3.40)            | <b>5.56 (1.43;21.69)*</b> |
| Modelling                                              | <b>2.18 (1.39;3.42)**</b> | <b>2.67 (1.30;5.49)**</b>       | 1.34 (0.87;2.08)            | 1.54 (0.91;2.62)          |
| – Modelling <i>separate item</i>                       | 1.33 (0.97;1.84)          | 0.73 (0.48;1.12)                | 0.78 (0.55;1.10)            | 1.09 (0.73;1.62)          |
| <b><i>Habit variables<sup>1</sup></i></b>              |                           |                                 |                             |                           |
| Habit strength                                         | <b>2.50 (1.31;4.77)**</b> | 1.61 (0.64;4.08)                | 0.68 (0.36;1.28)            | 2.38 (0.89;6.37)          |
| Taste preference                                       | 0.69 (0.35;1.32)          | 0.95 (0.51;1.76)                | 1.17 (0.72;1.91)            | 0.80 (0.40;1.57)          |
| <b>Nagelkerke R<sup>2</sup> (adjusted)<sup>2</sup></b> | <b>.592</b>               | <b>.495</b>                     | <b>.281</b>                 | <b>.356</b>               |

REF = reference category.

<sup>1</sup> Higher scores indicate expectation of more SSB consumption/higher score on unfavourable behaviour.

<sup>2</sup> Nagelkerke R square statistic represents the estimated level of variance explained by the regression model.

Note: results from the full model with all independent variables; numbers printed in **bold** represent significant association between independent variable and  $\leq 2$  vs  $> 2$  SSB intake in servings per day of child in that model. Asterisks' represent the level of significance of the association between independent variable and outcome, corrected for all other variables: \* p<0.05, \*\* p<0.01, \*\*\* p<0.001.
