# Supplementary material for: Children’s sugar-sweetened beverages consumption: associations with family and home-related factors, differences within ethnic groups explored
Source: BMC Public Health. 2017 Feb 14;17:195. doi: 10.1186/s12889-017-4095-0 (PMC5310003; doi:10.1186/s12889-017-4095-0)
Supplement: Additional file 1: Table S1. — Descriptive results and scale information for the family and home-related factors (n = 644). (PDF 142 kb) [file 12889_2017_4095_MOESM1_ESM.pdf]

**Table S1. Descriptive results and scale information for the family and home-related factors (n=644)**

|                                                                                                   | General information |           | Scale information |                                 | (Example of) Questionnaire item                                                                                                 |
|---------------------------------------------------------------------------------------------------|---------------------|-----------|-------------------|---------------------------------|---------------------------------------------------------------------------------------------------------------------------------|
|                                                                                                   | n (%)               | mean (SD) | # items           | Cronbach's $\alpha$<br>(stand.) |                                                                                                                                 |
| <b><i>Cognitive variables<sup>1</sup></i></b>                                                     |                     |           |                   |                                 |                                                                                                                                 |
| Parental attitude towards child's SSB intake<br>(range 1-5)                                       | 625 (97.0%)         | 3.0 (0.6) | 2                 | 0.8                             | e.g. "When my child drinks SSB, I find it..."<br>(pleasant – not so pleasant)                                                   |
| Parental attitude towards decreasing child's SSB intake<br>(range 1-5)                            | 595 (92.4%)         | 2.2 (0.8) | 4                 | 0.7                             | e.g. "I believe my child should consume less SSB."<br>(agree – disagree)                                                        |
| Parents subjective norm towards the child's SSB intake<br>(range 1-5)                             | 627 (97.4%)         | 2.3 (0.9) | 1                 | -                               | i.e. "When comparing your child with other children of his/her age, does your child consume more or less SSB?"<br>(more – less) |
| Perceived behavioural control of parents towards having their child drink less SSB<br>(range 1-5) | 625 (97.0%)         | 2.3 (0.9) | 2                 | 0.8                             | e.g. "Does it seem difficult or easy to let your child drink less SSB?" (difficult – easy)                                      |
| <b><i>Environmental variables<sup>1</sup></i></b>                                                 |                     |           |                   |                                 |                                                                                                                                 |
| Availability of SSB at home/school (range 1-5)                                                    | 629 (97.7%)         | 3.7 (1.3) | 2                 | 0.6                             | e.g. "SSB's are usually available for my child at home."<br>(agree – disagree)                                                  |
| Parenting practices towards child's SSB intake<br>(range 1-5)                                     | 625 (97.0%)         | 2.7 (0.7) | 4                 | 0.7                             | e.g. "To what extent do you monitor how often your child drinks SSB?" (never – always)                                          |
| Rules at home with regard to child's SSB intake<br>(range 1-2)                                    | 624 (96.9%)         | 1.4 (0.4) | 2                 | 0.8                             | e.g. "Are there in your home rules about how many SSB your child may consume?" (yes – no)                                       |
| Modelling of SBB intake by the parents (range 1-5)                                                | 617 (95.8%)         | 2.6 (1.2) | 2                 | 0.7                             | e.g. "How often do you (or your partner) drink SSB together with your child? (never – every day, multiple times)                |
| – Separate item 'Parental Modelling' (range 1-5)                                                  | 604 (93.8%)         | 2.5 (1.5) | 1                 | -                               | i.e. "Does your partner consume SSB often?"<br>(never – always)                                                                 |

| <b><i>Habitual variables<sup>1</sup></i></b>                  |             |           |   |     |                                                                                   |
|---------------------------------------------------------------|-------------|-----------|---|-----|-----------------------------------------------------------------------------------|
| Habit strength of the child's SSB intake ( <i>range 1-5</i> ) | 614 (95.3%) | 3.0 (0.9) | 4 | 0.8 | e.g. "My child often drinks SSB without thinking about it."<br>(agree – disagree) |
| Taste preference of child towards SSB ( <i>range 1-5</i> )    | 634 (98.4%) | 4.3 (1.0) | 1 | -   | i.e. "My child likes the taste of SSB."<br>(agree – disagree)                     |

<sup>1</sup>Higher scores indicate the expectation of more SSB consumption/a higher score on unfavourable behaviour.
