# Supplementary material for: Children’s sugar-sweetened beverages consumption: associations with family and home-related factors, differences within ethnic groups explored
Source: BMC Public Health. 2017 Feb 14;17:195. doi: 10.1186/s12889-017-4095-0 (PMC5310003; doi:10.1186/s12889-017-4095-0)
Supplement: Additional file 2: Table S2. — P-values for interaction between ethnic background and the determinants on child’s SSB intake in litre per day (n = 644). (PDF 219 kb) [file 12889_2017_4095_MOESM2_ESM.pdf]

**Table S2. P-values for interaction between ethnic background and the determinants on child's SSB intake in litre per day\* (n=644)**

|                                                                                                         | SSB in litre                                     |                                              |                                           |
|---------------------------------------------------------------------------------------------------------|--------------------------------------------------|----------------------------------------------|-------------------------------------------|
|                                                                                                         | <i>p</i> -value<br>Dutch vs Surinamese/Antillean | <i>p</i> -value<br>Dutch vs Moroccan/Turkish | <i>p</i> -value<br>Dutch vs Other/unknown |
| <b><i>Cognitive variables<sup>1</sup></i></b>                                                           |                                                  |                                              |                                           |
| Parental attitude towards child's SSB intake ( <i>range 1-5</i> )                                       | <i>NS</i>                                        | 0.003                                        | <i>NS</i>                                 |
| Parental attitude towards decreasing child's SSB intake ( <i>range 1-5</i> )                            | 0.002                                            | <i>NS</i>                                    | <i>NS</i>                                 |
| Parents subjective norm towards the child's SSB intake ( <i>range 1-5</i> )                             | 0.009                                            | <i>NS</i>                                    | <i>NS</i>                                 |
| Perceived behavioural control of parents towards having their child drink less SSB ( <i>range 1-5</i> ) | 0.002                                            | <i>NS</i>                                    | <i>NS</i>                                 |
| <b><i>Environmental variables<sup>1</sup></i></b>                                                       |                                                  |                                              |                                           |
| Availability of SSB at home/school ( <i>range 1-5</i> )                                                 | <i>NS</i>                                        | 0.014                                        | <i>NS</i>                                 |
| Parenting practices towards child's SSB intake ( <i>range 1-5</i> )                                     | <0.001                                           | <i>NS</i>                                    | <i>NS</i>                                 |
| Rules at home with regard to child's SSB intake ( <i>range 1-2</i> )                                    | 0.001                                            | <i>NS</i>                                    | 0.007                                     |
| Modelling of SSB intake by the parents ( <i>range 1-5</i> )                                             | 0.073                                            | <i>NS</i>                                    | <i>NS</i>                                 |
| – Separate item 'Parental Modelling' ( <i>range 1-5</i> )                                               | <i>NS</i>                                        | <i>NS</i>                                    | <i>NS</i>                                 |
| <b><i>Habitual variables<sup>1</sup></i></b>                                                            |                                                  |                                              |                                           |
| Habit strength of the child's SSB intake ( <i>range 1-5</i> )                                           | 0.059                                            | 0.011                                        | <i>NS</i>                                 |
| Taste preference of child towards SSB ( <i>range 1-5</i> )                                              | <i>NS</i>                                        | <i>NS</i>                                    | <i>NS</i>                                 |

\*Separately per block of variables (cognitive, environmental, and habitual) the interaction was analysed tested with one-way Anova (continuous variables) and Chi-square test (categorical variables), being only corrected for the variables in that block and not for any other variables or socio-demographic variables. As seen in this supplement table 2, several interactions differed statistically ( $p < 0.10$ ) [60].

*NS* = not significant ( $p > 0.10$ ).

<sup>1</sup>Higher scores indicate the expectation of more SSB consumption/a higher score on unfavourable behaviour.
